# Supplementary material for: A targeted genetic association study of epithelial ovarian cancer susceptibility
Source: PubMed Central journal article supplement (PMC4884925; doi:10.18632/oncotarget.7121), 2016-02-01
Supplement: oncotarget-07-7381-s001.pdf [file oncotarget-07-7381-s001.pdf]

# **A targeted genetic association study of epithelial ovarian cancer susceptibility**

## **Supplementary Material**

### **Supplemental Methods**

#### ***Selection of variants within eleven known EOC susceptibility regions***

Data from 25 individuals diagnosed with ovarian or peritoneal (N=1) cancer (17 high grade serous carcinoma [HGSC], 3 clear cell, 3 endometrioid, 1 mucinous, 1 low grade serous carcinoma [LGSC]) was used to select custom variants at 11 EOC susceptibility regions (see **Supplemental Table 1 & 3**). Germline whole genome sequencing was performed using an Illumina GAIIx, providing a mean of 48-fold coverage and with 86% of the genome on average having at least 10-fold coverage [1]. Variants considered for inclusion on the array were those in linkage disequilibrium (LD,  $r^2 \geq 0.2$ ) with the most strongly associated published risk variants, and in the 20kb flanking sequence of these variants. Variants were excluded if present in HapMap Phase II[2] or on the Illumina Collaborative Oncology Gene-environment Study[3] array because the intended focus was previously ungenotyped rarer variants. A total of 7,901 variants met these criteria and fell into 1,759 clusters of variants in perfect LD. For each cluster, one variant was selected for genotyping if cluster size was <5 variants, two variants were selected if cluster size was 5-10 variants, and three variants if cluster size was >10 variants. A total of 778 variants were selected in this way. Additional custom variants within these 11 regions were also added to the array, including the known EOC risk variants, and variants from an unpublished HGSC GWAS. Variants residing within these 11 genomic regions that were part of the standard array content on the Affymetrix Axiom Exome array (Affymetrix Corporation, Santa Clara, CA) are also included in this report.

#### ***Whole genome sequencing variants outside of known EOC susceptibility regions***

Serous EOC cases that were whole genome sequenced (18 HGSC and 1 LGSC; **Supplemental Table 3**) were also used to select novel variants outside of the susceptibility regions as described above. Our aim was to identify rare variants. In brief, whole genome sequencing data identified 800,000 variants, whose

minor allele frequency (MAF) was compared to 1000 Genomes Project (GP) data for 174 Europeans (CEU/GBR, version 20110521) who were assumed unaffected by EOC. A Z-test for equal proportions was used to assess variants for association with EOC risk, and rank them according to p-value. Rather than select these variants based solely on extreme p-values, which may reflect sequence platform differences or the small sample size of the study, variants were placed in one of four categories based on MAF and each category was over-sampled. The four categories were: 1) MAF > 0 in serous EOC cases, monomorphic in 1000 GP (“EOC+”); 2) polymorphic in cases and 1000 GP, but MAF greater in cases (“EOC↑”); 3) polymorphic in cases and 1000 GP, but MAF less in cases (“EOC↓”); and 4) monomorphic in cases, MAF > 0 in 1000 GP (“EOC-”). In total, we selected the 1,800 custom variants from each category with the lowest p-values (7,200 in total). After satisfying the Affymetrix probe design criteria, 7,189 variants were included on the array.

#### ***NF-κB and endometrioid EOC GWAS variants***

We included 1,170 variants in NF-κB binding motifs that were validated or predicted to disrupt binding[4, 5] and 132 variants surrounding SNPs in NF-κB related candidate genes that were previously associated with EOC risk[6] as custom content. We also included 2,000 of the most significantly associated variants from an unpublished GWAS among 1,452 endometrioid EOC cases.

#### **References for Supplemental Methods**

1. Chien J SH, Fan JB, Humphray S, Cunningham JM, Kalli KR, Oberg AL, Hart S, Li Y, Davila JI, Baheti S, Wang C, Kocher J-PA, Dietmann S, Atkinson EJ, Asmann Y, Bell D, Ota T, Tarabishy Y, Kuang R, Bibikova M, Cheetham RK, Grocock RJ, Swisher EM, Peden J, Bentley D, Kaufmann S, Hartmann LC, Shridhar V, and Goode EL. TP53 mutations, tetraploidy, and homologous recombination repair defects in early stage high grade serous ovarian cancer. *Nucleic Acids Res.* 2015.
2. Frazer KA, Ballinger DG, Cox DR, Hinds DA, Stuve LL, Gibbs RA, Belmont JW, Boudreau A, Hardenbol P, Leal SM, Pasternak S, Wheeler DA, Willis TD, Yu F, Yang H, Zeng C, et al. A second generation human haplotype map of over 3.1 million SNPs. *Nature.* 2007; 449(7164):851-861.

3. Pharoah PD, Tsai YY, Ramus SJ, Phelan CM, Goode EL, Lawrenson K, Buckley M, Fridley BL, Tyrer JP, Shen H, Weber R, Karevan R, Larson MC, Song H, Tessier DC, Bacot F, et al. GWAS meta-analysis and replication identifies three new susceptibility loci for ovarian cancer. *Nat Genet.* 2013; 45(4):362-370.
4. Kasowski M, Grubert F, Heffelfinger C, Hariharan M, Asabere A, Waszak SM, Habegger L, Rozowsky J, Shi M, Urban AE, Hong MY, Karczewski KJ, Huber W, Weissman SM, Gerstein MB, Korbel JO, et al. Variation in transcription factor binding among humans. *Science.* 2010; 328(5975):232-235.
5. Karczewski KJ, Tatonetti NP, Landt SG, Yang X, Slifer T, Altman RB and Snyder M. Cooperative transcription factor associations discovered using regulatory variation. *Proc Natl Acad Sci U S A.* 2011; 108(32):13353-13358.
6. Charbonneau B, Block MS, Bamlet WR, Vierkant RA, Kalli KR, Fogarty Z, Rider DN, Sellers TA, Tworoger SS, Poole E, Risch HA, Salvesen HB, Kiemeny LA, Baglietto L, Giles GG, Severi G, et al. Risk of ovarian cancer and the NF-kappaB pathway: genetic association with IL1A and TNFSF10. *Cancer Res.* 2014; 74(3):852-861.

Supplemental Figure 1

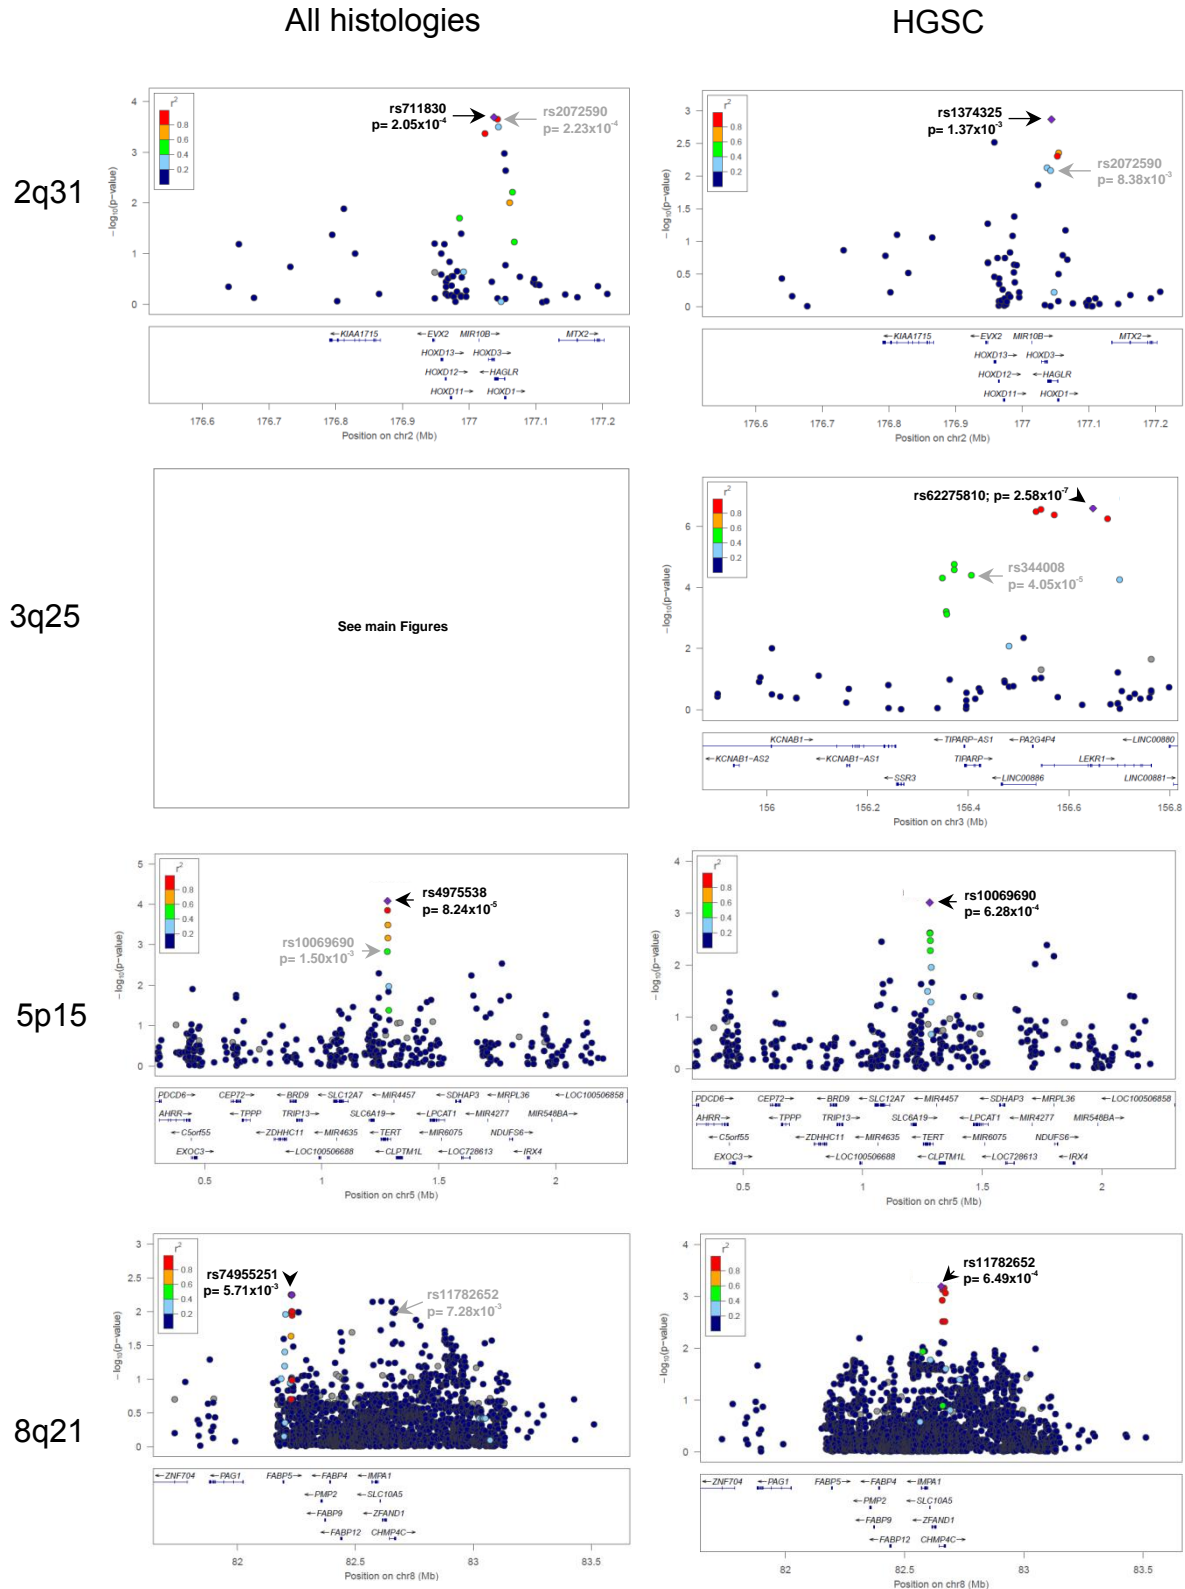

All histologies

HGSC

8q24

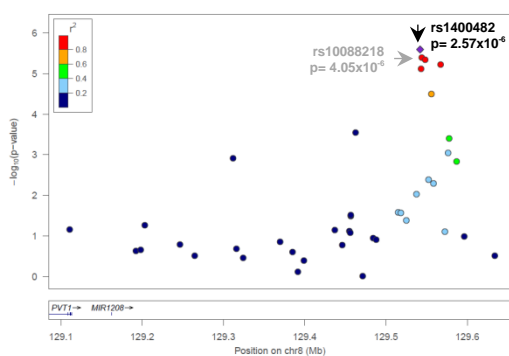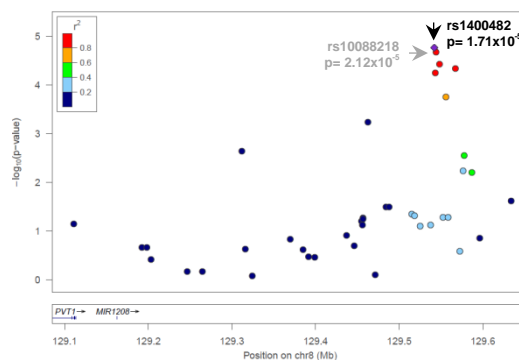

9p22

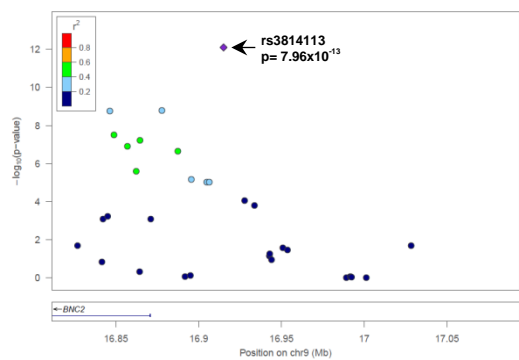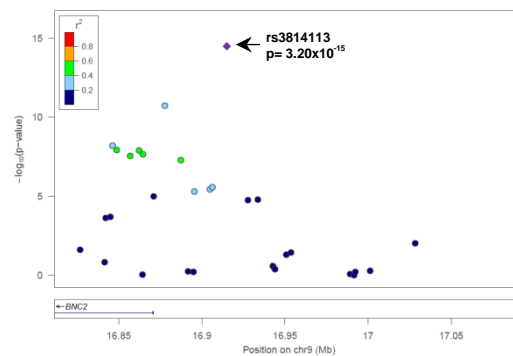

10p12

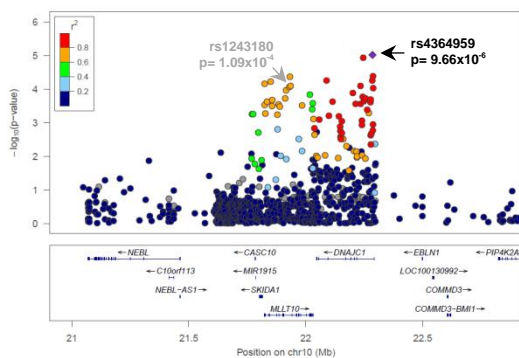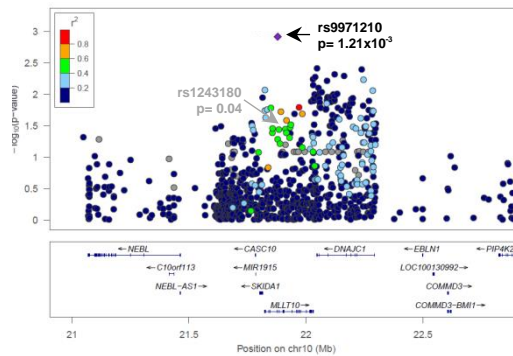

17q12

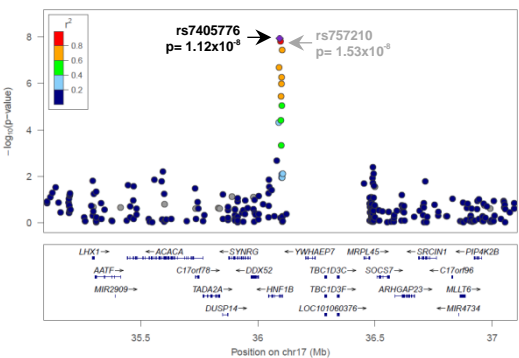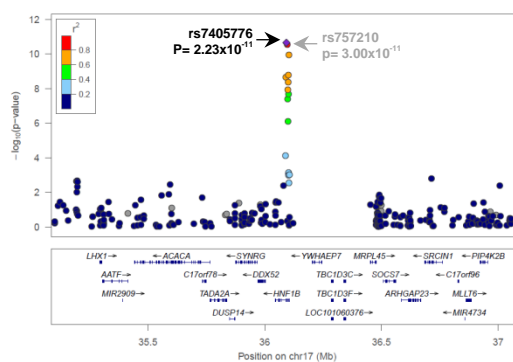

All histologies

HGSC

17q21.31

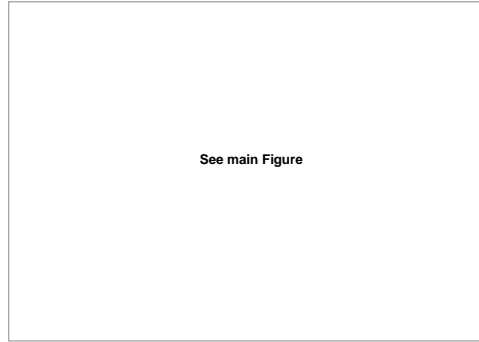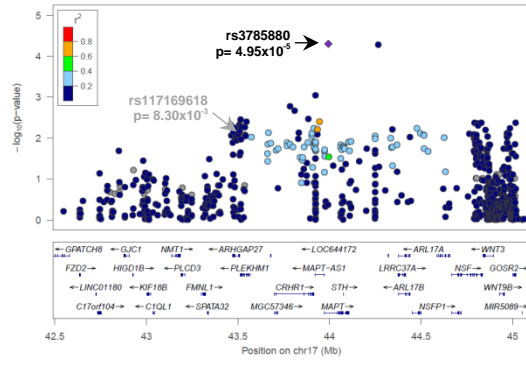

17q21.32

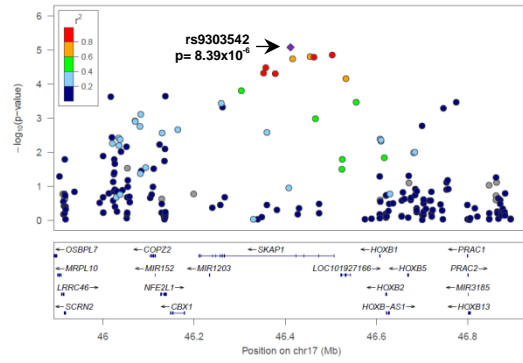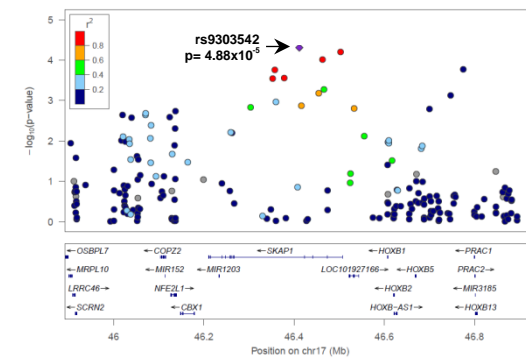

19p13

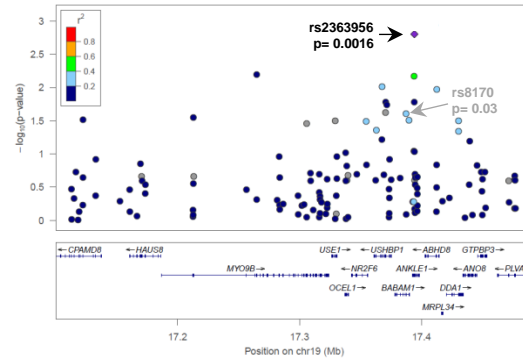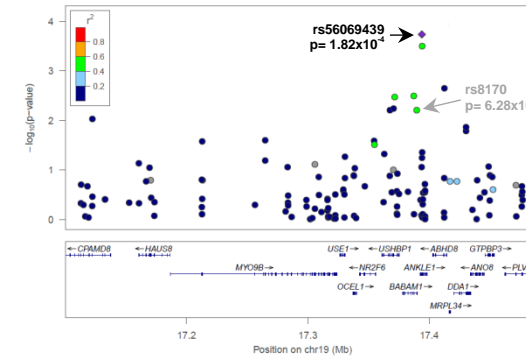

**Supplemental Table 1.** Eleven previously reported EOC susceptibility regions: prior association results that guided current variant selection.

| Locus    | Prior most associated variant | Position  | Reported P-value    | Histotype | Reference                | Region investigated in the current study (size) | Number of variants genotyped |
|----------|-------------------------------|-----------|---------------------|-----------|--------------------------|-------------------------------------------------|------------------------------|
| 2q31     | rs2072590                     | 177042633 | $5 \times 10^{-11}$ | All       | Goode et al., 2010       | 176530334-177230512 (0.7 Mb)                    | 66                           |
| 3q25     | rs2665390                     | 156397749 | $7 \times 10^{-8}$  | Serous    | Goode et al., 2010       | 155882491-156806437 (0.9 Mb)                    | 63                           |
| 5p15     | rs10069690                    | 1279790   | $1 \times 10^{-11}$ | Serous    | Bojensen et al., 2013    | 296759-2296759 (2.0 Mb)                         | 352                          |
| 8q21     | rs11782652                    | 82653644  | $7 \times 10^{-10}$ | Serous    | Pharoah et al., 2013     | 81653644-83653644 (2.0 Mb)                      | 2,141                        |
| 8q24     | rs10088218                    | 129543949 | $8 \times 10^{-15}$ | Serous    | Goode et al., 2010       | 129095188-129644067 (0.5 Mb)                    | 43                           |
| 9p22     | rs3814113                     | 16915021  | $4 \times 10^{-21}$ | Serous    | Song et al., 2009        | 16821349-17083703 (0.3 Mb)                      | 28                           |
| 10p12    | rs1243180                     | 21915619  | $2 \times 10^{-8}$  | All       | Pharoah et al., 2013     | 20915619-22915619 (2.0 Mb)                      | 850                          |
| 17q12    | rs757210                      | 36096515  | $8 \times 10^{-10}$ | Serous    | Pharoah et al., 2013     | 35096515-37096515 (2.0 Mb)                      | 261                          |
| 17q21.31 | rs12942666                    | 43499839  | $3 \times 10^{-10}$ | Serous    | Permeth-Wey et al., 2013 | 42499839-45083402 (2.6 Mb)                      | 786                          |
| 17q21.32 | rs9303542                     | 46411500  | $1 \times 10^{-7}$  | Serous    | Goode et al., 2010       | 45901906-46925056 (1.0 Mb)                      | 197                          |
| 19p13    | rs8170                        | 17389704  | $4 \times 10^{-11}$ | Serous    | Bolton et al., 2010      | 17110400-17481000 (0.4 Mb)                      | 132                          |

The genotyping array was designed in mid-2012 based on the most strongly associated variants known at the time. Mb, megabase; Build 37.

**Supplemental Table 2.** Characteristics of study participants

|                                           | Cases<br>(N=4,973) | Controls<br>(N=5,640) |
|-------------------------------------------|--------------------|-----------------------|
| <b>Study: region</b>                      |                    |                       |
| NEC: New Hampshire and Massachusetts, USA | 1,210 (24%)        | 1,708 (30%)           |
| DOV: Washington, USA                      | 789 (16%)          | 796 (14%)             |
| MAY: Upper Midwest, USA                   | 645 (13%)          | 713 (13%)             |
| NCO: Central/Eastern North Carolina, USA  | 456 (9%)           | 459 (8%)              |
| USC: Los Angeles County, USA              | 415 (8%)           | 461 (8%)              |
| OVA: Alberta and British Columbia, Canada | 372 (8%)           | 409 (7%)              |
| HOP: Northeast, USA (PA, OH, NY)          | 370 (7%)           | 383 (7%)              |
| UCI: Southern California, USA             | 160 (3%)           | 160 (3%)              |
| NHS: USA                                  | 139 (3%)           | 162 (3%)              |
| MSK: New York City, NY, USA               | 132 (3%)           | 161 (3%)              |
| POL: Warsaw and Lodz, Poland              | 127 (3%)           | 59 (1%)               |
| NJO: New Jersey, USA                      | 102 (2%)           | 105 (2%)              |
| HAW: Hawaii, USA                          | 56 (1%)            | 64 (1%)               |
| <b>Age, years</b>                         |                    |                       |
| Mean (Range)                              | 59 (21-91)         | 58 (19-91)            |
| <b>Site (cases only)</b>                  |                    |                       |
| ovary                                     | 4,570 (92%)        | n.a.                  |
| primary peritoneum                        | 341 (7%)           | n.a.                  |
| fallopian tube                            | 62 (1%)            | n.a.                  |
| <b>Grade (cases only)</b>                 |                    |                       |
| well differentiated                       | 425 (10%)          | n.a.                  |
| moderately differentiated                 | 861 (21%)          | n.a.                  |
| poorly differentiated                     | 2,260 (55%)        | n.a.                  |
| undifferentiated                          | 536 (13%)          | n.a.                  |
| unknown                                   | 891                | n.a.                  |
| <b>Stage (cases only)</b>                 |                    |                       |
| localized                                 | 536 (14%)          | n.a.                  |
| regional                                  | 567 (14%)          | n.a.                  |
| distant                                   | 2,838 (72%)        | n.a.                  |
| unknown                                   | 1032               | n.a.                  |
| <b>Histotype (cases only)</b>             |                    |                       |
| high grade serous                         | 3,573 (75%)        | n.a.                  |
| endometrioid                              | 835 (18%)          | n.a.                  |
| low grade serous                          | 152 (3%)           | n.a.                  |
| clear cell                                | 121 (3%)           | n.a.                  |
| mucinous                                  | 71 (1%)            | n.a.                  |
| other, unknown                            | 221                | n.a.                  |

n.a., not applicable



**Supplemental Table 3.** Tumor characteristics of White germline whole-genome sequenced EOC patients from the Mayo Clinic.

| Site       | Histotype         | Grade                        | FIGO stage | Age at diagnosis |
|------------|-------------------|------------------------------|------------|------------------|
| ovary      | High-grade serous | 4, undifferentiated          | IA         | 66               |
| peritoneum | High-grade serous | 4, undifferentiated          | IIB        | 81               |
| ovary      | High-grade serous | 4, undifferentiated          | IIB        | 50               |
| ovary      | High-grade serous | 4, undifferentiated          | IIC        | 55               |
| ovary      | High-grade serous | 4, undifferentiated          | IIC        | 84               |
| ovary      | High-grade serous | 4, undifferentiated          | IIC        | 77               |
| ovary      | High-grade serous | 2, moderately differentiated | IIC        | 79               |
| ovary      | High-grade serous | 3, poorly differentiated     | IA         | 52               |
| ovary      | High-grade serous | 3, poorly differentiated     | IB         | 82               |
| ovary      | High-grade serous | 3, poorly differentiated     | IC         | 71               |
| ovary      | High-grade serous | 3, poorly differentiated     | IC         | 60               |
| ovary      | High-grade serous | 3, poorly differentiated     | IC         | 52               |
| ovary      | High-grade serous | 3, poorly differentiated     | IC         | 48               |
| ovary      | High-grade serous | 3, poorly differentiated     | IIB        | 78               |
| ovary      | High-grade serous | 3, poorly differentiated     | IIC        | 50               |
| ovary      | High-grade serous | 3, poorly differentiated     | IIC        | 54               |
| ovary      | High-grade serous | 3, poorly differentiated     | IIIB       | 83               |
| ovary      | Clear cell        | 2, moderately differentiated | IC         | 64               |
| ovary      | Clear cell        | 3, poorly differentiated     | IC         | 82               |
| ovary      | Clear cell        | 3, poorly differentiated     | IC         | 50               |
| ovary      | Endometrioid      | 2, moderately differentiated | IC         | 69               |
| ovary      | Endometrioid      | 3, poorly differentiated     | IA         | 48               |
| ovary      | Endometrioid      | 4, undifferentiated          | IA         | 74               |
| ovary      | Mucinous          | 2, moderately differentiated | IA         | 63               |
| ovary      | Low-grade serous  | 1, well differentiated       | IIC        | 82               |
